# Supplementary material
Source: ML conference proceedings conference paper supplement (https://proceedings.neurips.cc/paper_files/paper/2020/hash/a96b65a721e561e1e3de768ac819ffbb-Abstract.html)
Supplement: Supplementary file [file a96b65a721e561e1e3de768ac819ffbb-Supplemental.zip]

---

# Task-Oriented Feature Distillation

## Supplementary Material

---

Anonymous Author(s)

Affiliation

Address

email

### 1 Architecture of Auxiliary Classifiers

The auxiliary classifier is composed of several depthwise separable convolution layers, a pooling layer, and a fully connected layer. Depthwise separable convolution is proposed in MobileNet [5] to reduce the size of the vanilla convolutional layer. To reduce the training overhead of TOFD, we apply depthwise separable convolution in the auxiliary classifiers instead of the vanilla convolutional layers. Take ResNet [4] as an example, the first, second, third auxiliary classifier has 3, 2, 1 depthwise separable convolution layers, respectively. Besides, a fully connected and a global average pooling layer are attached after the depthwise separable convolutional layers. Note that the stride of each depthwise separable convolution is 2, the kernel size is 3, and the padding is 1.

Table 1: Sensitivity study of the choice of teachers.

| Teacher Model | Student Accuracy |
|---------------|------------------|
| ResNet18      | 82.65            |
| ResNet50      | 82.45            |
| ResNet101     | 82.92            |
| ResNet152     | 82.47            |

### 2 Influence from Teachers

Recent researchers in knowledge distillation show that the performance of students is sensitive to the selection of the teacher model and a teacher model with the highest accuracy may not be the best teacher model for knowledge distillation. [6, 2]. In this section, we show how does the performance of student models influenced by the choice of teachers. As shown in Table 1, we show the accuracy (%) of a ResNet18 student model trained on CIFAR100 by the proposed TOFD with different teacher models. It is observed that the range between the best teacher (resnet101) and the worst teacher (resnet50) is less than 0.50%, indicating that TOFD is not very sensitive to the choice of teacher models. In the image classification task, we usually take ResNet101 and ResNet152 as the teacher. In the 3D classification task, we take the ResGCN16 model as the teacher.

### 3 More Examples of Figure 3

In Figure.3 of the submitted paper, we have compared the Grad-CAM [7] visualization results of features in the backbone and the task-oriented features captured by the convolutional layers in the auxiliary classifier. Due to the limitation of paper length, we only put one example in the paper. Here we show the visualization results of another four images.

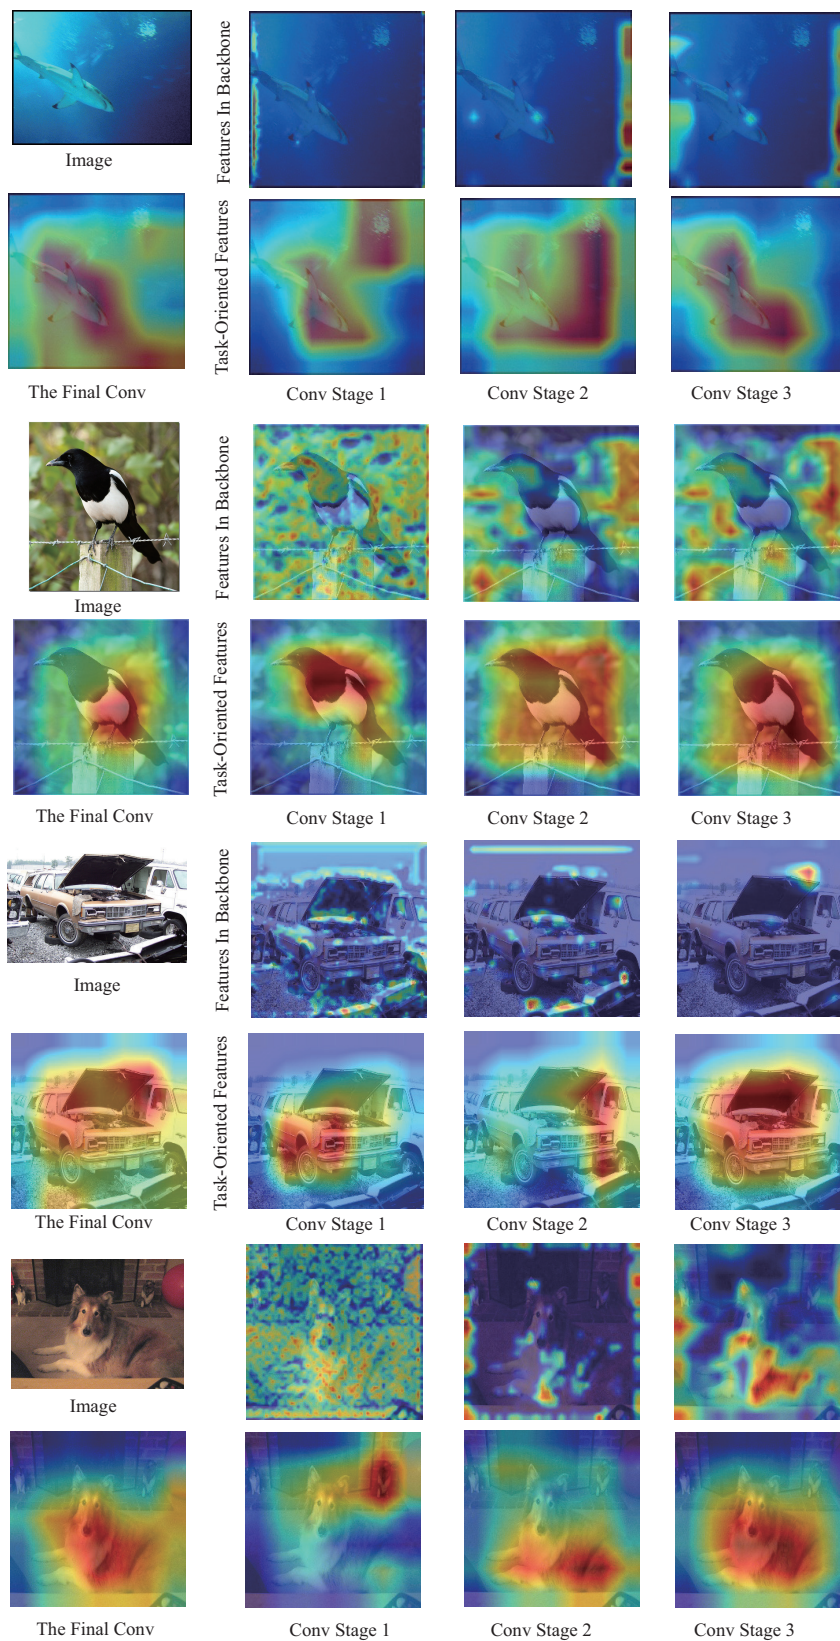

Figure 1: Comparison on the Grad-CAM [7] visualization results between the features in the backbone layers and the task-oriented features captured by the convolutional layers in the auxiliary classifiers.

## 25 4 Implementation Tricks

26 **Cut-Out Data Augmentation.** Besides the basic data augmentation methods such as padding,  
27 cropping, horizon flipping, we have applied the cut-out [3] data augmentation in the experiments on  
28 image classification tasks.

29 **Orthogonal Loss Decay.** As discussed by Bansal *et al.* [1], the orthogonal loss may have a negative  
30 impact at the end of the training period. We take their regularization coefficients decay scheme to  
31 alleviate this issue.

## 32 References

- 33 [1] Nitin Bansal, Xiaohan Chen, and Zhangyang Wang. Can we gain more from orthogonality regularizations  
34 in training deep networks? In *Advances in Neural Information Processing Systems*, pages 4261–4271, 2018.
- 35 [2] Jang Hyun Cho and Bharath Hariharan. On the efficacy of knowledge distillation. In *The IEEE International*  
36 *Conference on Computer Vision (ICCV)*, October 2019.
- 37 [3] Terrance DeVries and Graham W Taylor. Improved regularization of convolutional neural networks with  
38 cutout. *arXiv preprint arXiv:1708.04552*, 2017.
- 39 [4] Kaiming He, Xiangyu Zhang, Shaoqing Ren, and Jian Sun. Deep residual learning for image recognition.  
40 In *CVPR*, pages 770–778, 2016.
- 41 [5] Andrew G Howard, Menglong Zhu, Bo Chen, Dmitry Kalenichenko, Weijun Wang, Tobias Weyand, Marco  
42 Andreetto, and Hartwig Adam. Mobilenets: Efficient convolutional neural networks for mobile vision  
43 applications. In *CVPR*, 2017.
- 44 [6] Seyed-Iman Mirzadeh, Mehrdad Farajtabar, Ang Li, and Hassan Ghasemzadeh. Improved knowledge distil-  
45 lation via teacher assistant: Bridging the gap between student and teacher. *arXiv preprint arXiv:1902.03393*,  
46 2019.
- 47 [7] Ramprasaath R Selvaraju, Michael Cogswell, Abhishek Das, Ramakrishna Vedantam, Devi Parikh, and  
48 Dhruv Batra. Grad-cam: Visual explanations from deep networks via gradient-based localization. In  
49 *Proceedings of the IEEE international conference on computer vision*, pages 618–626, 2017.
